# Supplementary material for: A Facile Nanodelivery Platform Based on Functionalized Hyperbranched Poly(ether‐ester) for Individualized Antitumor Drugs: Pingyangmycin as a Model
Source: Hindawi journal article supplement (doi:10.1155/2014/601272), 2014-01-01
Supplement: f1 [file 601272.f1.pdf]

## Supplementary data 1.

Scheme. End-functionalization between HPE and amino group/carbonyl group

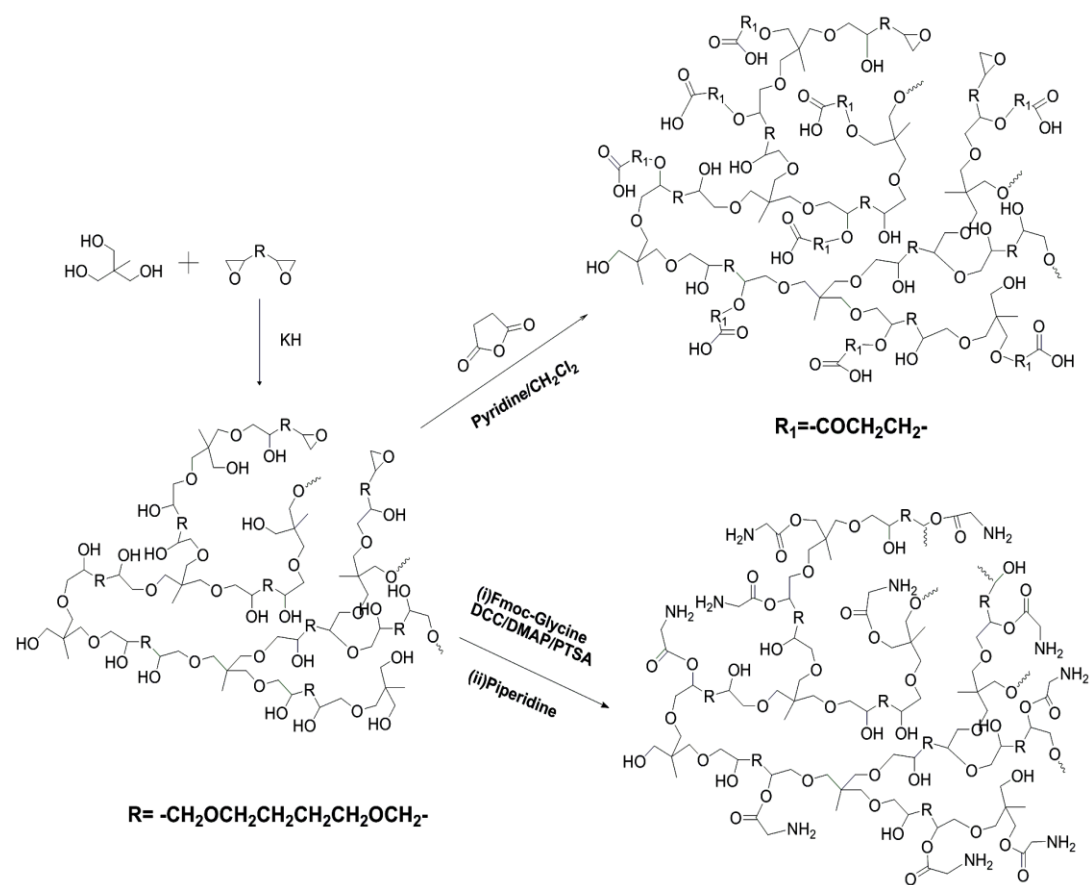

***Supplementary data 2-1.*** 3T3 cell viability following treatment with various concentrations of HPE-derivatives

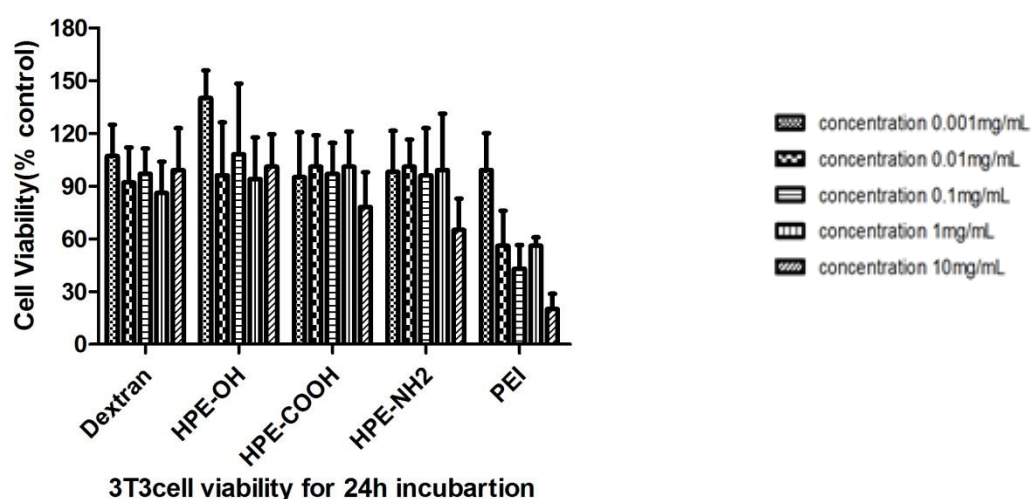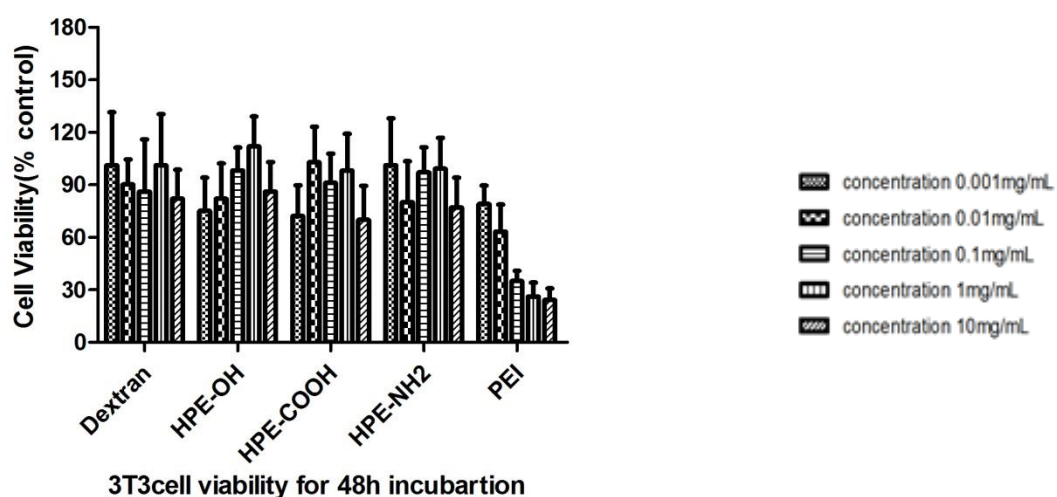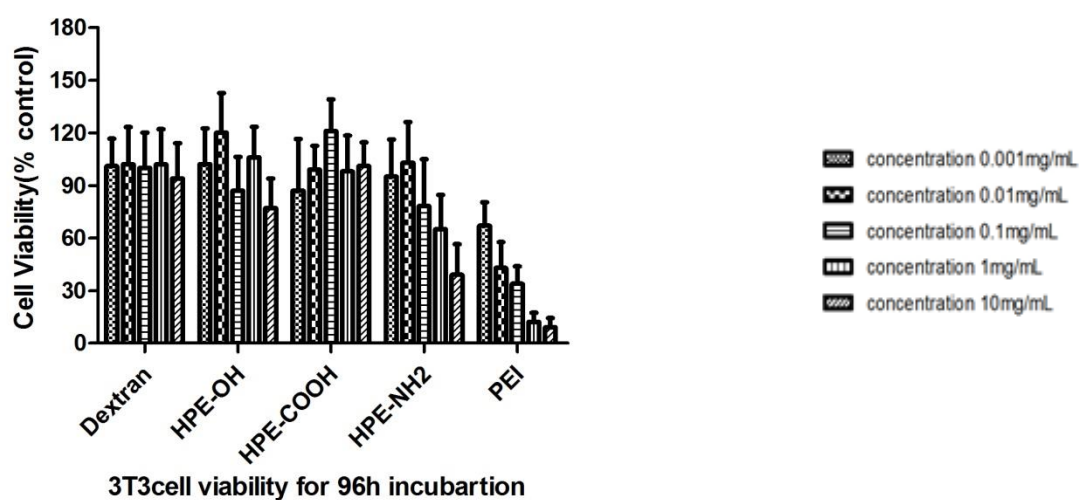

**Supplementary data 2-2-1.** visualization of surface morphological features of 3T3

cells following incubation with low concentration (10 µg/ml) of functionalized HPE-derivatives and controls.

|                                                                                     |                                                                                      |
|-------------------------------------------------------------------------------------|--------------------------------------------------------------------------------------|
| 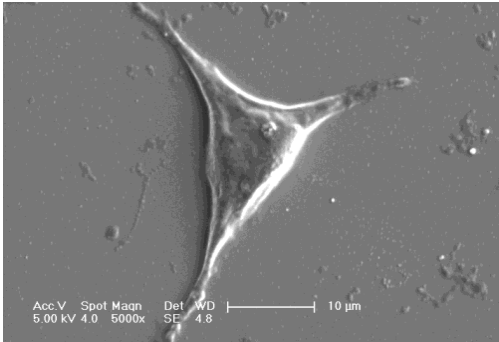   |    |
| <p><i>Cell incubated in low-concentration HPE-OH for 1h</i></p>                     | <p><i>Cell incubated in low-concentration HPE-COOH for 1h</i></p>                    |
|   |   |
| <p><i>Cell incubated in low-concentration HPEE-NH2 for 1h</i></p>                   | <p><i>Cell incubated in PBS (as Blank Control) for 1h</i></p>                        |
|  |  |
| <p><i>Cell incubated in low- concentration PEI (as control)</i></p>                 | <p><i>Cell incubated in low-concentration HPE-CHO for 1h</i></p>                     |

|                                 |                                             |
|---------------------------------|---------------------------------------------|
| <i>Positive Control) for 1h</i> | <i>Dextran (as Negative Control) for 1h</i> |
|---------------------------------|---------------------------------------------|

**Supplementary data 2-2-2.** SEM visualization of surface morphological features of 3T3 cells following incubation with a high concentration (1 mg/ml) of functionalized HPE-derivatives and controls.

|                                                                                     |                                                                                      |
|-------------------------------------------------------------------------------------|--------------------------------------------------------------------------------------|
| 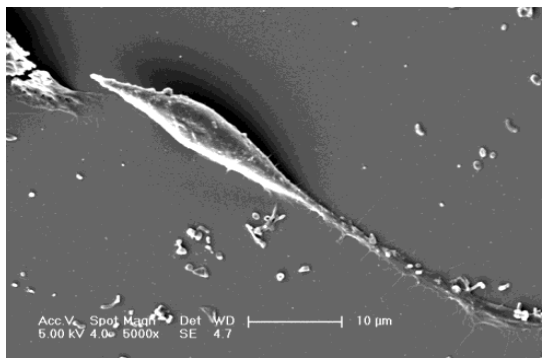  |   |
| <i>Cell incubated in high-concentration HPE-OH for 1h</i>                           | <i>Cell incubated in high-concentration HPE-COOH for 1h</i>                          |
|  |  |
| <i>Cell incubated in high-concentration HPE-NH2 for 1h</i>                          | <i>Cell incubated in PBS (as Blank Control) for 1h</i>                               |

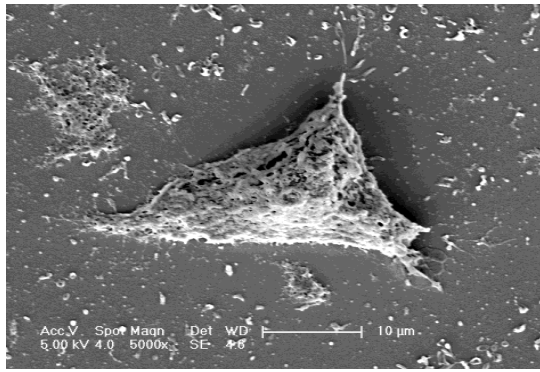

*Cell incubated in high-concentration PEI  
(as Positive Control) for 1h*

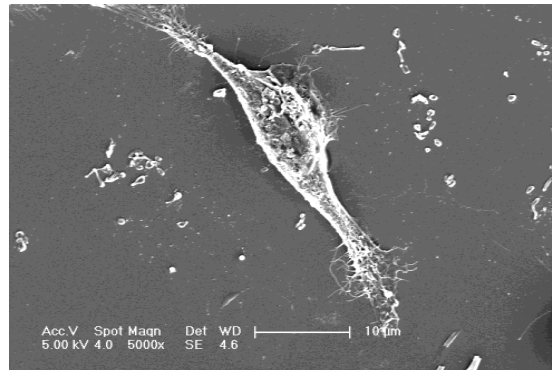

*Cell incubated in high-concentration  
Dextran (as Negative Control) for 1h*
